# Supplementary material for: Pre-emergence herbicidal efficiency and uptake of atrazine-loaded zein nanoparticles: a sustainable alternative to weed control
Source: Royal Society of Chemistry journal article supplement (doi:10.1039/d2en01064j), 2023-01-01
Supplement: d2en01064j1.pdf [file d2en01064j1.pdf]

**Pre-emergence herbicidal efficiency and uptake of atrazine-loaded zein  
nanoparticles: a sustainable alternative to weed control**

Lucas Bragança Carvalho<sup>1</sup>, Isabela Silva Godoy<sup>2,3</sup>, Ana Cristina Preisler<sup>2,3</sup>, Patrícia Luiza de Freitas Proença<sup>1</sup>, Telma Saraiva-Santos<sup>4</sup>, Waldiceu Aparecido Verri Jr<sup>4</sup>, Halley Caixeta Oliveira<sup>2</sup>, Giliardi Dalazen<sup>3</sup>, Leonardo Fernandes Fraceto<sup>1</sup>

<sup>1</sup> Institute of Science and Technology, São Paulo State University (UNESP), Av. Três de Março 511, 18087-180 Sorocaba, SP, Brazil

<sup>2</sup> Department of Animal and Plant Biology, State University of Londrina, PR 445, km 380, 86057-970 Londrina, PR, Brazil

<sup>3</sup> Department of Agronomy, State University of Londrina, PR 445, km 380, 86057-970 Londrina, PR, Brazil

<sup>4</sup> Department of Pathology, State University of Londrina, PR 445, km 380, 86057-970 Londrina, PR, Brazil

**SUPPLEMENTARY MATERIAL**

**Table S1** The concentration of salts presents in the nutrient solution.

| Salt                                                 | Concentration      |
|------------------------------------------------------|--------------------|
| $\text{KH}_2\text{PO}_4$                             | 1 mM               |
| $\text{Ca}(\text{NO}_3)_2 \cdot 4\text{H}_2\text{O}$ | 4 mM               |
| $\text{K}_2\text{SO}_4$                              | 2 mM               |
| $(\text{NH}_4)_2\text{SO}_4$                         | 4 mM               |
| $\text{MgSO}_4 \cdot 7\text{H}_2\text{O}$            | 2 mM               |
| $\text{H}_3\text{BO}_3$                              | 92.5 $\mu\text{M}$ |
| $\text{MnCl}_2 \cdot 4\text{H}_2\text{O}$            | 18 $\mu\text{M}$   |
| $\text{ZnCl}_2$                                      | 1.5 $\mu\text{M}$  |
| $\text{Na}_2\text{MoO}_4 \cdot 2\text{H}_2\text{O}$  | 0.56 $\mu\text{M}$ |
| $\text{CuCl}_2 \cdot 2\text{H}_2\text{O}$            | 0.66 $\mu\text{M}$ |
| $\text{FeSO}_4$                                      | 100 $\mu\text{M}$  |

**Table S2** Physico-chemical properties of soil.

| Parameters                                      | Medium clay soil <sup>a</sup> |
|-------------------------------------------------|-------------------------------|
| Total sandy ( $\text{g} \cdot \text{kg}^{-1}$ ) | 691                           |
| Silt ( $\text{g} \cdot \text{kg}^{-1}$ )        | 48                            |
| Clay ( $\text{g} \cdot \text{kg}^{-1}$ )        | 261                           |
| pH ( $\text{CaCl}_2$ )                          | 5.3                           |
| OM ( $\text{g} \cdot \text{dm}^{-3}$ )          | 67                            |
| P ( $\text{mg} \cdot \text{dm}^{-3}$ )          | 77                            |
| K ( $\text{mmolc} \cdot \text{dm}^{-3}$ )       | 10.6                          |
| Ca ( $\text{mmolc} \cdot \text{dm}^{-3}$ )      | 41                            |
| Mg ( $\text{mmolc} \cdot \text{dm}^{-3}$ )      | 20                            |
| H+Al ( $\text{mmolc} \cdot \text{dm}^{-3}$ )    | 28                            |
| SB ( $\text{mmolc} \cdot \text{dm}^{-3}$ )      | 71.6                          |
| CEC ( $\text{mmolc} \cdot \text{dm}^{-3}$ )     | 99.6                          |
| V (%)                                           | 72                            |

<sup>a</sup>Soil analyzed at the Laboratory of Mineral Fertilizers of the Superior School of Agriculture "Luiz de Queiroz", University of São Paulo, Piracicaba, São Paulo, Brazil. OM: organic matter; H+Al: acidity potential; SB: sum of exchangeable bases; CEC: cation exchange capacity; V: base saturation.

**Table S3** Atrazine contents in roots stems and leaves of (c) *Bidens pilosa* and (d) *Zea mays* subjected to treatment with zein nanoparticles containing the herbicide (ZNP-ATZ) and commercial herbicide (ATZ). Values are represented by the mean  $\pm$  SD (n=3), with exposure times to each treatment of 2, 4, 8, 12, 24, 36, and 48 h. Different letters indicate that the values were significantly different according to the Tukey test ( $p < 0.05$ ). Lowercase letters compare values as a function of exposure time and uppercase letters compare values between treatments.

| Exposure<br>time (h) | Atrazine quantification ( $\mu\text{g g}^{-1}$ ) |                                 |                                           |                                 |                                |                                |
|----------------------|--------------------------------------------------|---------------------------------|-------------------------------------------|---------------------------------|--------------------------------|--------------------------------|
|                      | Root                                             |                                 | Stem                                      |                                 | Leaf                           |                                |
|                      | ATZ                                              | ZNP-ATZ                         | ATZ                                       | ZNP-ATZ                         | ATZ                            | ZNP-ATZ                        |
| 2                    | 32.65 $\pm$ 0.60 <sup>aBC</sup>                  | 16.24 $\pm$ 3.16 <sup>aA</sup>  | 1.31 $\pm$ 1.12 <sup>aA</sup>             | 1.83 $\pm$ 1.19 <sup>aA</sup>   | 0 <sup>aA</sup>                | 0 <sup>aA</sup>                |
| 4                    | 25.98 $\pm$ 4.63 <sup>aB</sup>                   | 25.82 $\pm$ 3.90 <sup>bB</sup>  | 2.60 $\pm$ 0.81 <sup>aA</sup>             | 3.68 $\pm$ 0.81 <sup>abAB</sup> | 0.15 $\pm$ 0.25 <sup>aA</sup>  | 0.32 $\pm$ 0.56 <sup>aA</sup>  |
| 8                    | 35.64 $\pm$ 7.91 <sup>aBC</sup>                  | 29.07 $\pm$ 5.53 <sup>bcB</sup> | 6.33 $\pm$ 0.52 <sup>bBCD</sup>           | 6.38 $\pm$ 1.91 <sup>bcBC</sup> | 0.80 $\pm$ 0.77 <sup>aA</sup>  | 0.49 $\pm$ 0.28 <sup>aA</sup>  |
| 12                   | 29.56 $\pm$ 4.25 <sup>aBC</sup>                  | 31.04 $\pm$ 5.35 <sup>bcB</sup> | 6.43 $\pm$ 0.54 <sup>bCD</sup>            | 7.02 $\pm$ 0.54 <sup>cdC</sup>  | 1.60 $\pm$ 1.49 <sup>aA</sup>  | 6.95 $\pm$ 1.62 <sup>bB</sup>  |
| 24                   | 30.46 $\pm$ 4.28 <sup>aBC</sup>                  | 35.28 $\pm$ 4.95 <sup>bcB</sup> | 6.63 $\pm$ 0.81 <sup>bCD</sup>            | 8.80 $\pm$ 1.25 <sup>dD</sup>   | 8.43 $\pm$ 1.33 <sup>bB</sup>  | 10.97 $\pm$ 1.57 <sup>bB</sup> |
| 36                   | 29.17 $\pm$ 5.78 <sup>aBC</sup>                  | 36.03 $\pm$ 5.58 <sup>bcB</sup> | 5.61 $\pm$ 0.44 <sup>b<sup>BC</sup></sup> | 5.60 $\pm$ 0.18 <sup>bcC</sup>  | 18.96 $\pm$ 0.49 <sup>cC</sup> | 11.35 $\pm$ 4.30 <sup>bB</sup> |
| 48                   | 32.66 $\pm$ 4.65 <sup>aBC</sup>                  | 43.56 $\pm$ 4.49 <sup>cC</sup>  | 5.63 $\pm$ 0.60 <sup>b<sup>BC</sup></sup> | 5.65 $\pm$ 0.38 <sup>bcC</sup>  | 28.06 $\pm$ 2.97 <sup>dD</sup> | 19.16 $\pm$ 0.97 <sup>cC</sup> |

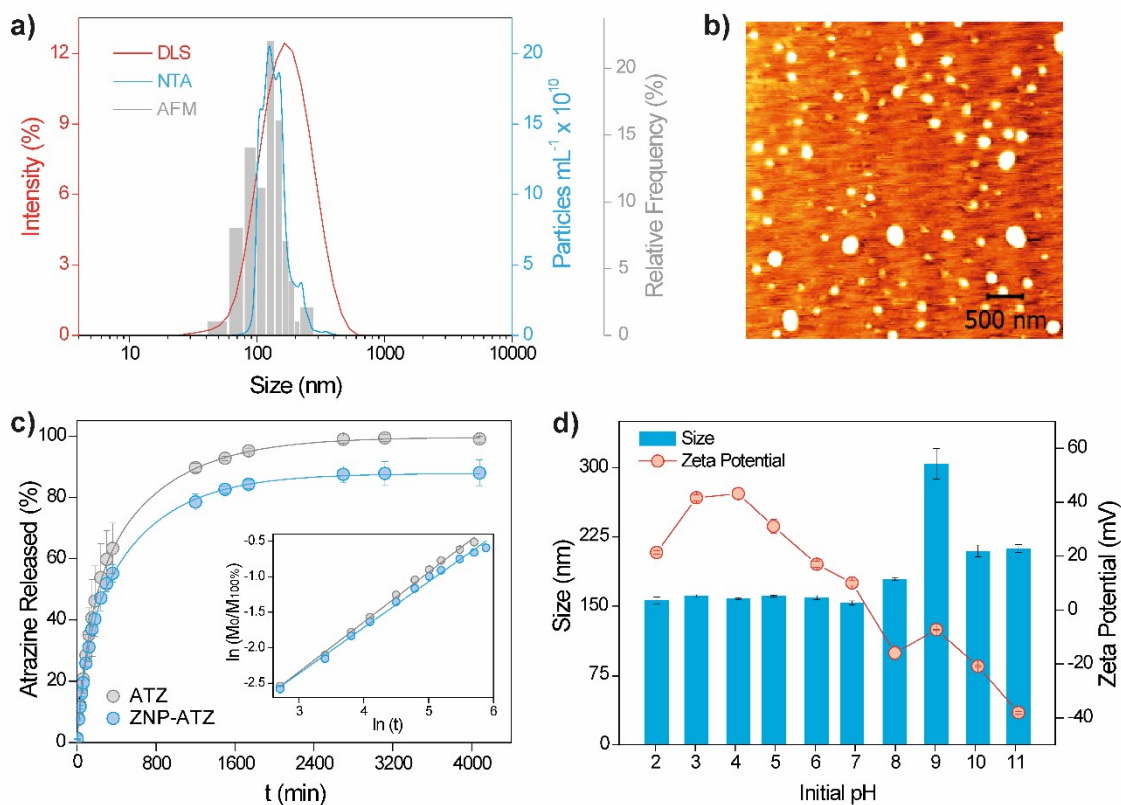

**Fig. S1** Characterization of zein nanoparticles with atrazine (ZNP-ATZ). (a) Size distribution by DLS, NTA, and AFM techniques; (b) AFM micrograph of ZNP-ATZ nanoparticles; (c) *In vitro* release profile of commercial atrazine (ATZ) and encapsulated in zein nanoparticles, followed by adjustment of release kinetics for ATZ and ZNP-ATZ to the mathematical model of Korsmeyer-Peppas; (d) Hydrodynamic size and zeta potential of nanoparticles as a function of pH.

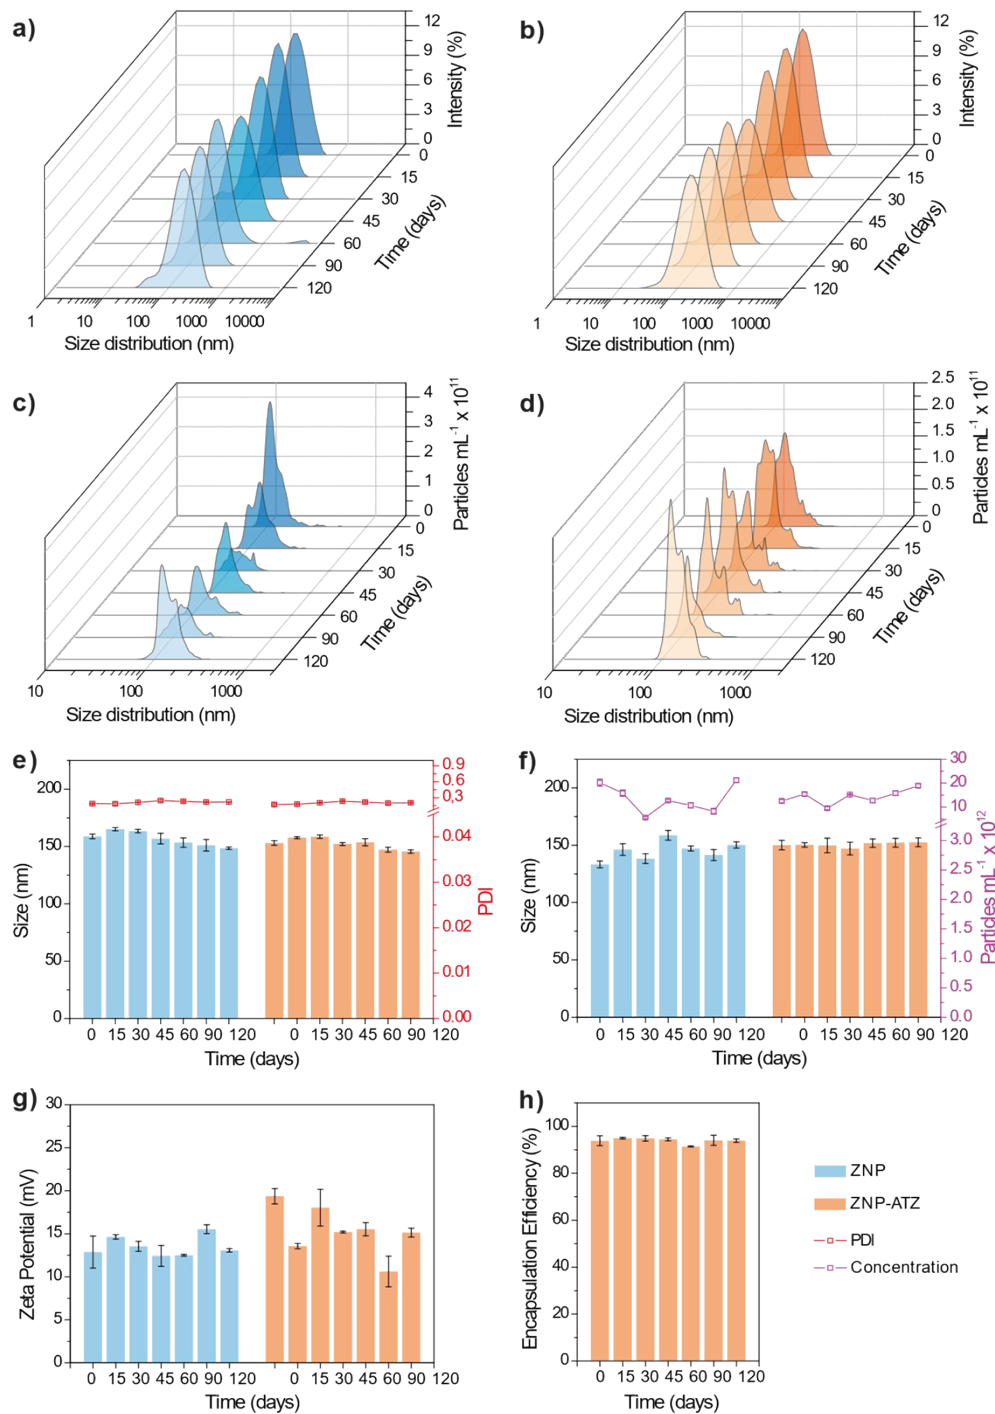

**Fig. S2** Characterization and stability of zein nanoformulations on days 0, 15, 30, 45, 60, 90, and 120 days after preparation, performed at 25 °C (n=3). Distribution of the hydrodynamic diameter of (a) zein nanoparticles (ZNP) and (b) zein nanoparticles with atrazine (ZNP-ATZ) obtained by DLS. Size distribution of (c) ZNP and (d) ZNP-ATZ nanoparticles obtained by NTA. (e) average hydrodynamic size and polydispersity index of ZNP and ZNP-ATZ nanoparticles. (f) average size and concentration of ZNP and ZNP-ATZ nanoparticles, obtained by NTA. (g) zeta potential of ZNP and ZNP-ATZ nanoparticles. (h) encapsulation efficiency of atrazine in zein nanoparticles.

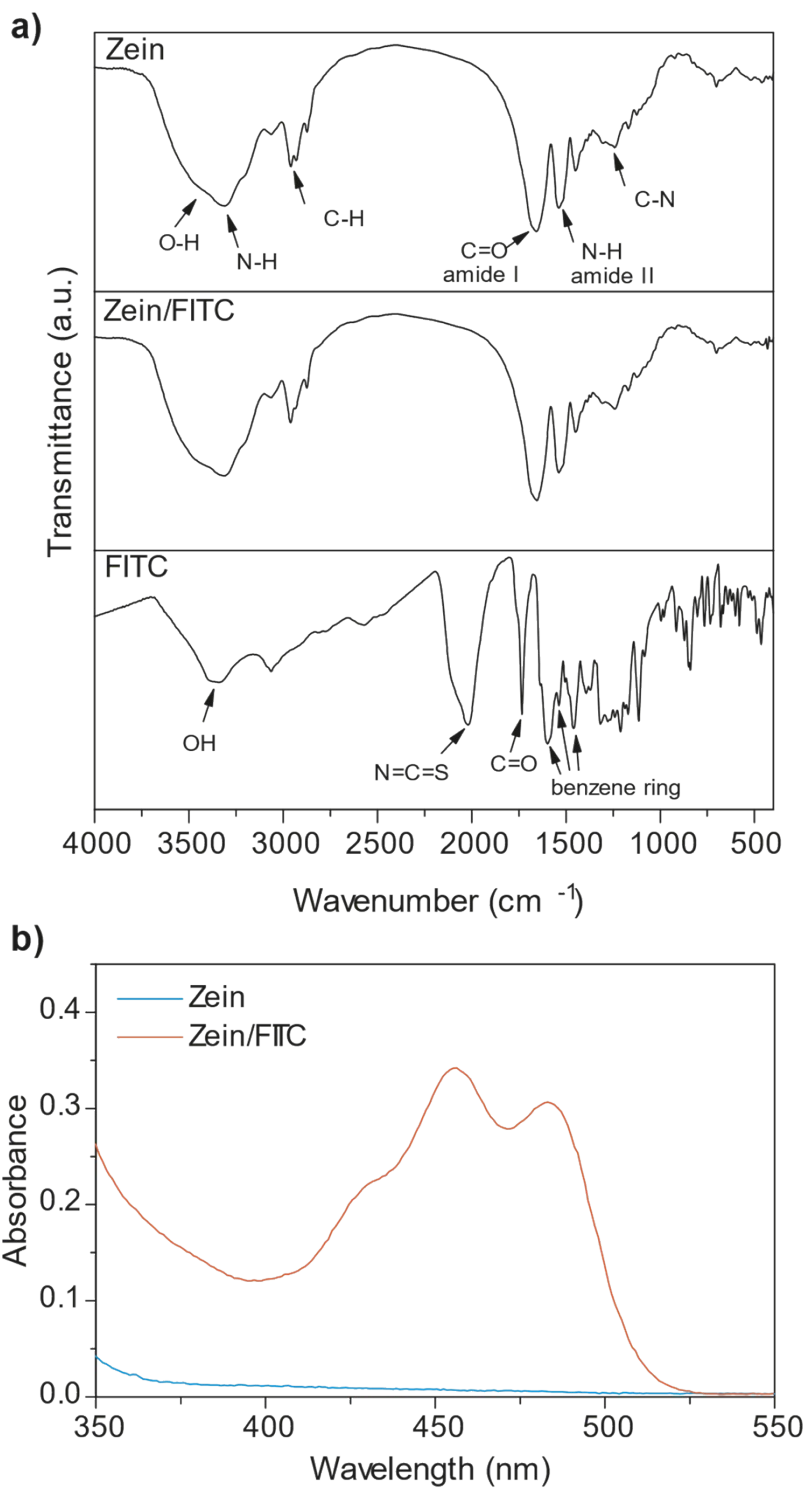

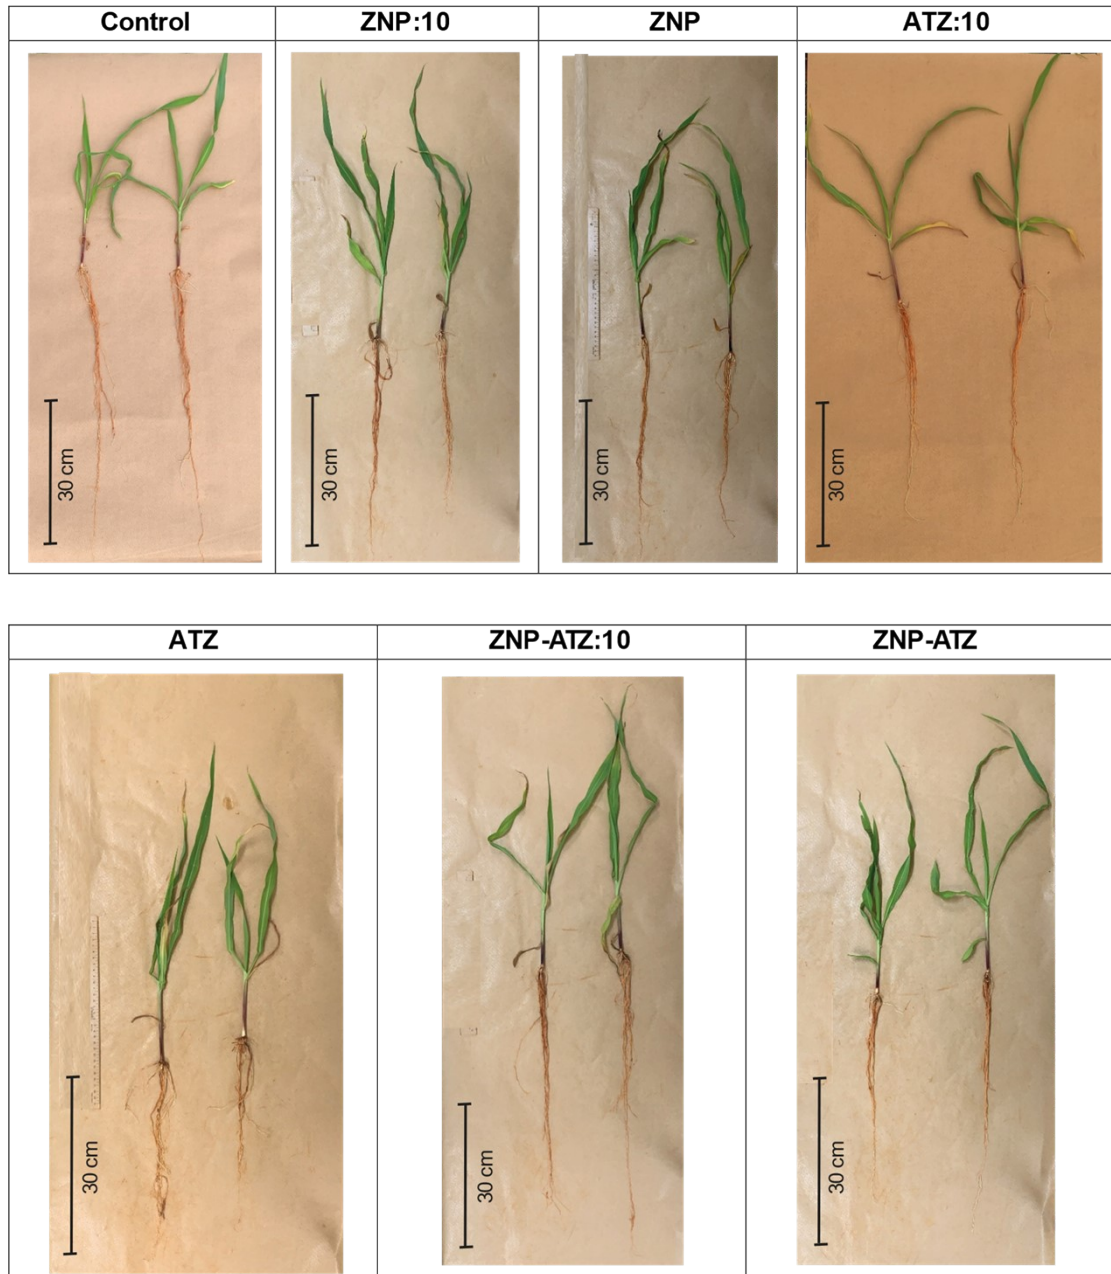

**Fig. S4** Visual symptoms in *Zea mays* plants from the pre-emergence experiment were submitted to the following treatments: control, nanoparticles without atrazine (ZNP), commercial atrazine (ATZ), and nanoparticles with atrazine (ZNP-ATZ) at doses of 2000 g ha<sup>-1</sup> and 200 g ha<sup>-1</sup> (indication of :10).
